# Supplementary material for: Climatic Elements as Development Factors of Health Tourism in Hail Region: using the Tourism Climate Index (TCI)
Source: Research Square preprint supplement (doi:10.21203/rs.3.rs-6252976/v1), 2025-04-22
Supplement: Supplementary file 1 [file 12445b5607e95fd098a9c1b1.xlsx]

## Sheet: Hail_station
year	Month	hPa	Tmax	Tmin	Tmean	RH	WS	WD	Rain
2022	1	1017.7	17.6	5.2	11.3	53	3.09	SSW	25.4
2022	2	1016.2	20.4	6.6	13.9	36	3.09	NNE	NA
2022	3	1013.4	24.5	10.4	17.7	24	3.6	NNE	0
2022	4	1008.7	32	17.3	24.9	23	3.09	NNE	30.8
2022	5	1007.1	34.8	21.6	28.6	17	3.09	NNE	0			hPa	المتوسط الشهري للضغط الجوي بوحدة هيكتوبار
2022	6	1001.3	40.4	25.5	33.9	15	3.09	NNE	0			Tmax	المتوسط الشهري لدرجات الحرارة العضمى بوحدة درجة مئوية
2022	7	998.9	40.1	25.9	34.1	16	2.57	NNE	0			Tmin	المتوسط الشهري لدرجات الحرارة الصغرى بوحدة درجة مئوية
2022	8	1000.3	40.5	27.1	34.7	20	3.09	NNE	NA			Tmean	المتوسط الشهري لدرجات الحرارة بوحدة درجة مئوية
2022	9	1005	38	22.8	31.3	18	2.57	NNE	0			RH	المتوسط الشهري للرطوبة النسبية بوحدة %
2022	10	1010.6	34	17.3	26.3	20	3.09	S	0			WS	المتوسط الشهري لسرعات الرياح بوحدة م/ث
2022	11	1014.5	24.7	13.8	18.9	60	3.09	NNE	34.5			WD	المتوسط الشهري لأتجاه الرياح
2022	12	1018.1	19	8.8	13.6	66	2.57	SSW	5.3			Rain	المجموع الشهري لكميات الامطار بوحدة ملم
2021	1	1019.2	18.8	6.9	12.6	57	2.57	ENE	NA
2021	2	1016.6	20.4	8.1	14.3	56	3.09	SSW	31.7			NA	بيانات غير متوفرة
2021	3	1012.2	27.2	12.5	20.1	32	3.6	SSW	0
2021	4	1011	31.1	16.6	24.4	26	3.6	NNE	0
2021	5	1005.1	36.4	22.2	30.5	18	3.6	NNE	0
2021	6	1003.3	39.9	25.6	33.9	15	3.09	NNE	0
2021	7	998.5	41.5	27.8	35.7	17	3.6	NNE	0
2021	8	1001.6	40.4	25.1	34	16	3.09	NNE	0
2021	9	1004.9	37.8	23.7	31.3	21	2.57	NNE	0
2021	10	1010.3	34.6	18.9	27.4	23	2.57	NNE	0
2021	11	1015.5	26.4	10.9	18.7	39	2.06	S	NA
2021	12	1018	20.2	7.9	13.8	51	2.57	S	1.7
2020	1	1019.6	16.2	2.4	9.5	47	3.6	S	0
2020	2	1017.2	20.8	6.1	13.4	42	3.6	WSW	2.5
2020	3	1011.7	25	11	18.3	35	4.12	NNE	7.8
2020	4	1008.7	29.7	15.9	22.9	34	4.12	NNE	8
2020	5	1007.5	35.1	21.3	29	21	3.6	S	0
2020	6	1003.2	38.2	24.1	32.1	17	3.6	NNE	1
2020	7	998.2	41.3	27	35.2	17	3.09	NNE	NA
2020	8	999.9	39	25.4	33.2	21	3.6	NNE	0
2020	9	1006	38.4	21.6	30.9	19	2.57	NNE	0
2020	10	1013.1	31.8	15.2	23.8	23	2.57	S	0
2020	11	1014.7	25	12.6	18.6	55	2.57	SSW	20.9
2020	12	1018.6	19.4	8.1	13.5	59	2.57	E	17
2019	1	1017	19.7	7.5	13.7	53	3.6	S	3.5
2019	2	1016.7	19.3	7.4	13.5	55	3.09	S	6.3
2019	3	1013.1	22.5	9	16.2	39	4.12	NNE	NA
2019	4	1010.7	27.5	13.7	21	36	3.6	NNE	24.6
2019	5	1006.9	35.9	20.9	29	25	3.6	WSW	3.5
2019	6	1003	40	25.1	33.7	18	3.09	NNE	0
2019	7	1000	40.1	26	34.2	17	3.6	NNE	0
2019	8	1001.8	39.3	24.9	33.1	18	3.6	E	0
2019	9	1004.4	39.5	23.9	32.6	18	2.57	S	0
2019	10	1009.9	33.5	20.4	27.2	33	2.57	NNE	6
2019	11	1015.3	24.3	11.8	18	55	2.57	NNE	12
2019	12	1017.3	20.3	6.1	13.3	51	3.09	S	2.5
2018	1	1018.9	18.2	3.8	11.1	45	3.09	S	0
2018	2	1014.6	23.8	9	16.3	38	3.6	S	4
2018	3	1011.7	29.2	13.7	22	29	3.6	SSW	0
2018	4	1008.4	29	15.8	22.6	41	3.6	NNE	28.9
2018	5	1006.4	34.1	20.8	27.8	28	3.6	NNE	16.6
2018	6	1002.3	38.7	25.2	32.9	17	3.6	NNE	0
2018	7	1000.1	39.6	25.4	33.8	17	3.6	NNE	0
2018	8	1001.6	39.4	24.6	33.2	19	3.09	NNE	0
2018	9	1005.3	39.9	24.9	33.1	18	2.57	NNE	NA
2018	10	1012.1	32	17.7	25.1	32	3.6	S	2.6
2018	11	1015.9	21.8	12	16.6	70	3.09	E	32.6
2018	12	1018.3	20.2	8.6	14.2	64	3.09	NNE	2.5
2017	1	1018.4	19.5	4.4	12.1	41	2.57	E	0
2017	2	1019.3	17.9	2.4	10.8	35	2.57	ENE	NA
2017	3	1011.3	25.1	10.9	18.4	35	3.6	W	7.5
2017	4	1010.6	31	17.1	24.4	29	3.6	NNE	NA
2017	5	1006.9	35.4	21.6	29	23	3.09	NNE	3.4
2017	6	1002.9	40.1	24.6	33.3	15	2.57	NNE	0
2017	7	998.5	42.1	27.5	35.9	14	3.09	N	0
2017	8	1000.7	42.2	27	35.7	15	2.57	NNE	0
2017	9	1006	39.3	22.7	31.7	15	2.57	E	0
2017	10	1009.9	34.3	16.9	26.3	21	3.09	S	0
2017	11	1014.8	25.7	12	19	48	3.09	ENE	13.4
2017	12	1021.2	21.3	5.6	13.2	44	3.09	SSW	1
2016	1	1019.9	17.8	4.2	10.9	56	3.09	NNE	1.4
2016	2	1018.5	22.1	6.3	14.6	42	3.6	S	NA
2016	3	1012.9	25.7	11.7	18.9	40	3.6	ENE	NA
2016	4	1010	30.2	13.9	23	32	3.09	WSW	4.4
2016	5	1007	35.3	20.3	28.8	21	3.6	W	1.2
2016	6	1003.6	39.2	23	32.8	13	3.09	NNE	0
2016	7	999.4	40.8	25.2	34.6	15	3.09	N	0
2016	8	1001.3	41.5	24.8	34.6	15	2.57	NNE	0
2016	9	1005.4	38.9	21.8	31.3	17	3.09	NNE	0
2016	10	1011	33.5	15.3	25.2	19	2.57	SSW	0
2016	11	1017.5	25	9.4	17.3	36	2.57	S	NA
2016	12	1019.2	20.2	5.6	12.8	47	3.09	S	1.7
2015	1	1019.6	19.5	3.4	11.3	44	3.6	S	0
2015	2	1014.3	22.8	7	15.1	37	4.12	W	NA
2015	3	1013.3	26.1	12.2	19.3	40	3.6	NNE	1.8
2015	4	1011	29.3	15.1	22.8	26	4.63	WSW	NA
2015	5	1006.3	35.7	21.8	29.5	18	4.63	W	NA
2015	6	1003.2	38.5	24.2	32.2	15	3.6	NNE	0
2015	7	1000.8	40.5	24.7	34	13	3.09	NNE	0
2015	8	1002.7	41.1	26.5	34.8	15	3.09	NNE	NA
2015	9	1005.7	39.3	23.6	32.2	16	3.09	NNE	NA
2015	10	1010.7	33.7	19.1	26.5	36	3.09	NNE	13.1
2015	11	1015.5	24.1	11.8	18	61	3.6	SSW	6.3
2015	12	1021	17.1	4.6	10.8	58	3.09	S	8.2
2014	1	1018.6	18.7	5.1	11.8	66	3.09	S	12
2014	2	1016.6	20.4	4.9	12.7	50	3.09	NNE	0
2014	3	1012.3	24.7	11.5	18	51	3.6	NNE	30.6
2014	4	1009.8	31.5	16.6	24.5	33	4.12	E	4.4
2014	5	1007	34.6	19.9	28	23	3.6	N	2.3
2014	6	1003.7	38	22.9	31.5	17	3.6	NNE	0
2014	7	1001.3	38.9	24.2	32.9	17	4.12	N	0
2014	8	1001.4	40.6	25	33.9	16	3.09	NNE	0
2014	9	1004.9	38.3	22.1	31.2	19	3.09	NNE	0
2014	10	1010.1	33.3	18.4	26.2	29	3.6	WSW	4.2
2014	11	1016.6	23.5	8.8	16.3	44	3.09	SSW	NA
2014	12	1019.3	21.7	7.3	14.5	58	3.09	SSW	NA
2013	1	1018	19.1	4.6	11.9	50	3.6	S	21.2
2013	2	1016.4	21.8	8.1	15.3	42	3.6	SSE	0
2013	3	1012.4	26.5	11.7	19.3	31	3.6	S	NA
2013	4	1009.1	27.9	14.1	21.6	30	4.12	NNE	29.4
2013	5	1006.5	33.7	19.2	26.9	26	3.6	E	2.2
2013	6	1002.5	38	22.2	31.4	15	3.6	N	0
2013	7	999.1	40.6	24.4	33.9	16	3.09	NNE	0
2013	8	1000.4	40	24.3	33.2	17	3.09	N	0
2013	9	1005.5	37.6	21.6	30.2	21	3.09	NNE	0
2013	10	1011.3	31.5	15	23.4	28	3.09	E	14.1
2013	11	1014.5	24.4	12	17.6	66	3.09	SSW	28
2013	12	1019.6	19.1	5	11.9	54	3.09	SSW	2.1
2012	1	1017.5	18.1	2.3	10.5	50	3.09	NNE	0
2012	2	1015.3	20.2	5.8	13.3	40	4.12	NNE	2.7
2012	3	1014.6	23.4	7.8	15.9	32	3.6	NNE	4.6
2012	4	1008	30.8	15.1	23.4	31	3.6	SSW	4.1
2012	5	1005.5	36.5	20.8	29.7	19	3.6	N	NA
2012	6	1001.9	39.4	22.8	32.5	15	3.6	NNE	0
2012	7	998.4	41.4	25.5	34.8	15	3.6	N	0
2012	8	1000.4	41.2	25	34.2	17	3.6	N	0
2012	9	1005	38.2	21.3	30.7	17	3.09	S	0
2012	10	1010.6	33.7	17.4	25.9	25	3.09	SSE	NA
2012	11	1014.8	25.1	10.7	18	49	3.09	S	2.7
2012	12	1016.6	20.3	6.1	13.4	56	3.09	S	NA
2010	1	1018.5	21.9	6.7	13.9	52	4.12	S	5.4
2010	2	1013.6	23.7	8.6	16.1	39	4.63	S	NA
2010	3	1014.2	26.9	11.3	19.3	32	4.63	S	35.5
2010	4	1009.7	30.7	16.3	23.6	36	4.63	S	3.4
2010	5	1005.4	35.9	20.8	29	22	4.63	N	3.6
2010	6	1002.6	39.9	24.6	33.1	15	4.12	N	NA
2010	7	999.8	41	26.4	34.4	16	4.63	N	0
2010	8	1000.3	41.5	25.6	34.4	16	3.09	N	0
2010	9	1005	39	22.2	31.3	18	3.09	S	0
2010	10	1011.2	33.8	17	25.8	26	3.09	S	NA
2010	11	1017.2	26.1	9.2	17.5	29	2.57	S	0
2010	12	1017.5	21	4.6	12.7	36	3.6	S	1.8
2011	1	1016.7	17.9	4.8	11.3	57	3.09	S	2.7
2011	2	1013.4	21.9	7.3	14.4	44	4.12	SSW	NA
2011	3	1015.8	23.1	8	16	33	3.6	NNE	NA
2011	4	1008.5	28.5	14.6	21.7	30	4.12	E	20.5
2011	5	1005.9	35.5	20.9	28.9	19	4.12	N	NA
2011	6	1001.7	38.7	23.4	32	16	3.6	NNE	2
2011	7	999.9	40	23.9	33.5	14	3.09	NNE	0
2011	8	999.4	40.9	24.6	34.2	16	3.09	NNE	0
2011	9	1003.6	37.9	22.2	31	18	3.09	NNE	0
2011	10	1010.2	33.3	16.3	25.3	27	3.09	SSW	0
2011	11	1015.8	21.3	6.7	14.3	47	2.57	NNE	10
2011	12	1020.4	19.8	4	11.8	46	3.09	S	0
2009	1	1020.1	17.9	1.2	9.4	41	3.09	S	0
2009	2	1014	22.4	7.3	15.1	31	4.63	SSW	NA
2009	3	1012.1	24.4	9.4	17.2	29	5.14	S	NA
2009	4	1009	31.1	14.4	23	25	4.63	N	NA
2009	5	1006.6	34.7	21.3	28.1	27	4.63	N	17.9
2009	6	1002.8	39.5	23.8	32.2	15	4.12	ENE	0
2009	7	1000.9	38.9	23.3	32.3	18	3.6	N	0
2009	8	1001	41.5	24.8	34.2	18	3.6	NNE	NA
2009	9	1005.6	38.2	21.1	30.3	21	4.12	N	0
2009	10	1011.3	32.3	16	24.5	28	3.6	S	8.9
2009	11	1015	23.8	10.5	17.1	50	3.6	S	16.6
2009	12	1016.4	19.8	6.5	12.9	63	3.6	S	10.1
2008	1	1018.6	14.3	2.3	8.2	59	3.6	S	41.3
2008	2	1020	19.2	4.5	11.9	43	4.12	NE	2.1
2008	3	1011.1	28.9	11.6	20.7	26	3.6	S	0
2008	4	1009.4	31.1	16.1	24	25	4.12	N	2.5
2008	5	1005.4	34.6	20.8	27.8	21	4.63	N	NA
2008	6	1002.2	38.1	22	31.1	15	4.12	N	0
2008	7	999.5	39.9	23.2	32.9	15	3.6	N	0
2008	8	999.9	39.9	24	33.1	15	3.6	NNE	0
2008	9	1005.1	38.4	22.4	30.9	18	3.6	S	0
2008	10	1012	32	15.9	24.1	28	4.12	S	NA
2008	11	1016.7	23	10.1	16.4	60	3.09	NNE	8.7
2008	12	1019.3	19.5	3.7	11.5	40	3.6	S	0
2007	1	1021.9	16.2	1.3	8.9	48	3.6	S	NA
2007	2	1014.2	21.3	5.4	13.9	37	4.63	S	0
2007	3	1012.2	24.3	8.9	17.1	32	4.12	W	26.7
2007	4	1008.3	30.2	14.9	22.9	29	4.63	N	10.3
2007	5	1005.2	36.1	21.6	29.4	21	4.63	N	NA
2007	6	1000.7	38.8	23.5	32.3	15	4.63	N	0
2007	7	1000.2	38.8	23.2	32.2	15	4.63	W	0
2007	8	1000.5	40.6	24	33.2	15	3.09	N	0
2007	9	1003.9	38.7	22.5	31.4	18	3.6	N	0
2007	10	1011.9	34	15.8	25.3	23	3.6	S	0
2007	11	1016	26.5	9.6	18	36	3.09	S	0
2007	12	1018.2	20.4	4.9	12.3	46	3.09	S	NA
2006	1	1017.5	19.1	4.5	11.7	45	3.6	S	5.2
2006	2	1015.5	20.6	7.4	13.8	47	4.12	S	27.5
2006	3	1012.3	25.7	9.8	18.3	31	4.12	S	NA
2006	4	1008.8	29.3	14.3	22.3	33	4.12	S	13.5
2006	5	1006.9	35	20.4	27.5	30	4.12	NNE	40.3
2006	6	1003	39.9	23.8	33	13	3.09	N	0
2006	7	1000.7	39.3	24	32.9	16	4.12	N	0
2006	8	1000.3	40.9	26.1	34.5	15	3.09	N	NA
2006	9	1005.7	38.4	21.7	30.7	17	3.09	NE	NA
2006	10	1009.9	33.8	18.5	26.3	29	3.6	S	7
2006	11	1015.5	23.4	9.3	16.3	45	3.09	SSW	2.6
2006	12	1020.5	15.8	1.3	8.6	45	3.6	S	NA
2005	1	1018.5	17.2	3.1	9.9	54	3.6	W	37.6
2005	2	1014.8	20.7	7.6	13.7	54	3.6	E	21
2005	3	1013.6	24.6	10.6	17.6	44	3.6	E	4.2
2005	4	1011	30.4	16.1	23.3	34	3.6	NNE	19.8
2005	5	1006.6	33.9	18.1	26.9	25	3.6	WSW	1.5
2005	6	1003.3	38.3	22.9	31.4	19	3.6	NW	0
2005	7	1001.3	39.9	23.8	33.2	18	3.6	N	0
2005	8	1001.7	40	23.6	33.1	19	3.09	N	NA
2005	9	1006.3	37.1	20.5	29.7	19	2.57	N	0
2005	10	1012.3	32.3	15.8	24.5	22	3.6	S	0
2005	11	1016.5	23.8	9.8	16.8	43	3.09	S	1
2005	12	1018.1	22.6	6.3	14.2	34	3.09	S	NA
2004	1	1014.7	19.1	6.6	12.5	61	3.09	SSW	26.2
2004	2	1018.2	20.9	5.8	13.4	37	3.6	SSW	0
2004	3	1014.4	26.3	10.7	18.7	28	4.12	NNE	NA
2004	4	1009.4	29	13.6	21.7	28	4.63	WSW	10.4
2004	5	1006.3	35.4	19.2	28.1	21	4.12	NNE	NA
2004	6	1003.9	38.4	21.9	31.3	15	4.12	N	0
2004	7	1000.5	40.6	24.2	33.6	14	3.09	NNE	0
2004	8	1001.7	40.4	22.9	32.8	15	3.09	N	0
2004	9	1006.7	38.3	19.5	29.7	15	2.57	N	0
2004	10	1012.2	34.3	16.5	25.6	19	3.09	S	NA
2004	11	1015.4	24.6	11.8	17.7	49	3.6	SSW	36.2
2004	12	1019.9	17.4	2.9	9.9	56	3.09	S	1.7
2003	1	1019.2	19.4	3.5	11.3	45	2.57	SSW	5.4
2003	2	1014.6	21.2	5.5	13.6	34	2.57	NNE	0
2003	3	1012.2	23.9	8.1	16.4	29	3.09	W	0
2003	4	1008.6	30.9	16.2	24	27	3.6	NNE	1.9
2003	5	1007.4	35.2	19.7	27.9	24	4.12	E	14.5
2003	6	1001.7	38.9	23.1	32	18	3.6	N	NA
2003	7	1000.1	39.7	23.4	32.8	15	3.09	N	0
2003	8	1000.7	41.6	24.4	34.2	15	3.09	N	0
2003	9	1006.4	38	20.8	30.2	18	2.57	N	0
2003	10	1011.1	34	17.5	26	25	2.57	E	0
2003	11	1016.4	24.1	11	17.3	48	3.09	E	47.8
2003	12	1018.4	19.6	8	13.2	60	3.6	E	3
2002	1	1019.9	15.9	3.3	9.8	57	2.06	NNE	NA
2002	2	1018	21.5	6.1	13.9	43	2.06	SSW	NA
2002	3	1012.8	24.1	9.8	17.2	46	2.06	W	40.3
2002	4	1008.6	29.9	14.7	22.6	33	3.09	SSW	33.4
2002	5	1005	35.8	19.9	28.5	22	2.57	NNE	NA
2002	6	1002.5	38.8	22.3	31.9	16	2.06	NNE	0
2002	7	1001.2	40.6	23.7	33.6	14	2.06	W	0
2002	8	1001.8	40	24.1	33.2	18	2.06	N	0
2002	9	1006.7	38.7	21.9	31.1	18	1.54	NNE	0
2002	10	1010.7	33.3	16.9	25.4	26	2.06	S	7.5
2002	11	1016.6	24.7	10.2	17.2	45	2.06	SSW	14.3
2002	12	1018	19.3	5.6	12.1	56	2.57	S	2.4
2001	1	1019.6	17.3	3	10.2	50	2.57	SSW	10.5
2001	2	1016.6	19.8	4.4	12.5	38	3.6	S	0
2001	3	1012.4	25.6	11.3	18.8	40	3.6	E	40.7
2001	4	1009.6	30.5	16.1	23.5	31	3.09	NNE	5.6
2001	5	1005.7	34.5	19.4	27.7	20	3.09	N	NA
2001	6	1002.4	38.4	21.5	31.3	17	2.57	N	0
2001	7	999.8	40	23.6	33.2	16	2.57	N	0
2001	8	1001	42	25.7	35	16	2.57	NNE	0
2001	9	1005	38.7	23	31.7	17	2.57	NNE	NA
2001	10	1010.9	32.9	15.9	24.7	27	2.57	NNE	NA
2001	11	1016.6	24.8	9.6	17.2	39	2.57	SSW	NA
2001	12	1016.7	21.7	9.2	15.2	61	2.06	SSW	22.3
2000	1	1017.5	16.9	3.9	10.3	50	3.09	S	11.3
2000	2	1017.5	19.3	5.5	12.3	40	3.09	E	28.6
2000	3	1014.3	24	7.9	16.4	26	3.6	NNE	NA
2000	4	1008.3	32.3	16.5	24.9	24	4.12	SSW	NA
2000	5	1006	35.6	19.2	28.4	19	3.6	W	7
2000	6	1001.9	39.5	22.2	32.1	13	3.09	NNE	0
2000	7	998.8	41.2	25.7	34.6	13	3.09	NNE	0
2000	8	999.9	42.1	25	34.5	14	2.57	NNE	0
2000	9	1005.1	37.3	20.7	29.9	17	2.57	NNE	0
2000	10	1010.7	31.3	16.1	24	33	3.09	E	19.1
2000	11	1016.2	21	10.3	15.5	67	2.57	E	44.8
2000	12	1018	19	5.9	12.2	59	2.57	E	11.8
1999	1	1017.5	18	5.6	11.7	56	2.57	SSW	26.9
1999	2	1014.9	22.2	9.5	15.5	53	3.09	E	1.7
1999	3	1012.2	23.2	9.2	16.5	39	3.6	WSW	21.9
1999	4	1010.7	29.7	14.4	22.6	26	3.6	NNE	16.5
1999	5	1006.7	35.7	20.3	28.8	19	3.09	NNE	NA
1999	6	1002.1	39.2	22.9	32.5	15	3.09	NNE	0
1999	7	999.9	39.1	23.7	32.8	17	3.09	N	0
1999	8	1000.8	40.8	25.1	34	17	2.57	NNE	0
1999	9	1004	38.7	23.3	31.8	18	2.57	NNE	0
1999	10	1010.1	34	16.3	26	23	2.57	S	0
1999	11	1016.6	25.4	10.3	17.9	39	2.57	S	1
1999	12	1020.5	20.8	4.5	12.4	46	2.57	S	25.7
1998	1	1018.6	15.9	3.7	9.7	60	3.6	S	22.7
1998	2	1016.6	20.1	4.7	12.6	45	3.6	S	1.8
1998	3	1014.4	21.1	8.8	15.1	49	4.12	S	77.3
1998	4	1011.1	29.3	13.9	22	33	3.6	E	11
1998	5	1007.7	34.3	18.7	27.2	23	3.6	S	2.6
1998	6	1002.6	39.9	23.3	32.8	14	3.09	N	NA
1998	7	999.7	40.1	23.6	33.2	16	3.09	N	4.1
1998	8	999.6	42.5	27.3	35.7	16	3.09	N	NA
1998	9	1004.5	39.2	23.1	31.8	19	3.09	NNE	NA
1998	10	1012.5	32.4	14.2	23.7	21	2.06	S	0
1998	11	1015.8	28.4	10.4	19.4	30	2.06	S	4.5
1998	12	1018.7	22.7	7.6	14.8	40	2.57	SSW	0
1997	1	1018.2	18.1	4.4	11.1	54	3.09	S	21.1
1997	2	1020	16.7	2.4	9.7	36	3.09	E	0
1997	3	1012.9	20.9	7.1	14.1	42	3.6	S	23.2
1997	4	1010.3	28.6	13.5	21.4	30	4.12	N	8.5
1997	5	1008.6	32.9	18.1	26.6	21	3.6	S	NA
1997	6	1002.1	38.5	22.2	31.8	16	3.6	N	0
1997	7	1001.6	38.1	22.3	31.7	16	3.6	N	0
1997	8	NA	38	21.7	31	22	3.6	N	0
1997	9	1006.1	38.9	21.6	31.2	17	3.6	S	0
1997	10	1012.1	31.7	17.7	24.6	37	3.6	S	8.9
1997	11	1015.3	22.5	11.3	16.6	64	2.57	S	38.9
1997	12	1018.9	18	6.1	11.9	62	3.09	SSW	2.7
1996	1	1016	18	5.8	11.7	63	3.09	S	22.7
1996	2	1014.1	20.4	7	13.8	48	3.09	E	9.7
1996	3	1011	22.9	8.9	16.1	37	3.6	W	8.5
1996	4	1009.8	29.2	14	21.9	35	3.09	E	2.7
1996	5	1006.3	35.6	20.8	29.2	24	3.09	N	NA
1996	6	1002.3	38.9	22.5	31.9	14	4.12	N	0
1996	7	1000	40.3	24.2	33.6	14	4.12	N	0
1996	8	1000.9	40.6	25	33.8	17	3.09	S	1
1996	9	1006.5	36.9	20.8	29.7	19	2.57	S	0
1996	10	1012.6	31.2	14.1	23.2	27	3.09	S	0
1996	11	1017.5	22.1	10	16	54	2.06	E	29.5
1996	12	1018	21.6	8.1	14.4	53	2.57	S	11.5
1995	1	NA	19.7	6.1	12.6	52	2.57	SSW	0
1995	2	NA	18.5	6.3	12.8	52	3.09	E	7.7
1995	3	NA	23.2	8.9	16.1	43	3.09	S	24.5
1995	4	NA	28.9	14.1	21.9	33	3.6	N	7.3
1995	5	1008.6	34.1	19	27.2	30	3.6	S	17.5
1995	6	1004.9	38.3	21.7	31.3	15	3.09	N	0
1995	7	NA	38	22.7	31.8	18	3.09	N	NA
1995	8	1002	40.6	24.1	33.7	16	2.57	N	3
1995	9	1008.3	36.5	19.1	29	19	2.06	N	0
1995	10	1011.2	33	15.9	25.1	22	2.57	S	0
1995	11	1016.2	24.1	9.8	16.9	35	2.57	S	7.7
1995	12	1020	15.1	6.4	10.5	78	2.06	E	55.2
1994	1	NA	19.5	6.8	12.9	56	3.09	S	13.4
1994	2	NA	19.6	4.2	12.1	39	3.09	S	1.3
1994	3	NA	23.1	8.2	16	37	3.6	S	4.9
1994	4	NA	29.3	15.4	22.6	33	3.6	E	18.4
1994	5	NA	33.9	19.4	27	25	4.12	E	8.2
1994	6	NA	37.2	20.3	30.3	14	3.09	N	0
1994	7	NA	36.1	20.6	29.8	17	3.6	N	0
1994	8	NA	39.2	22.1	32.3	17	2.06	N	0
1994	9	NA	35.9	21.2	29.2	22	2.57	N	NA
1994	10	NA	31.5	18	24.9	34	3.09	S	17.7
1994	11	NA	23.3	10.9	16.7	57	3.09	S	39
1994	12	NA	16.3	3.7	9.7	56	3.09	E	11.7
1993	1	NA	15.7	4	9.4	57	3.09	ENE	6.4
1993	2	NA	17.3	4.5	10.7	56	3.6	S	31.4
1993	3	NA	22.2	9.9	16.1	39	3.6	E	80.4
1993	4	NA	27.6	13.4	20.6	43	4.12	S	47.5
1993	5	NA	32.5	18.4	25.5	30	4.12	WSW	34.1
1993	6	NA	37.5	21.2	30.7	16	3.09	N	0
1993	7	NA	38.6	21.8	31.8	13	3.6	N	0
1993	8	NA	38.8	22.6	31.9	15	3.09	N	0
1993	9	NA	38	20.7	30.2	15	2.57	S	0
1993	10	NA	31.4	17.7	24.5	35	3.09	S	27.6
1993	11	NA	24.7	10.4	17.3	43	3.09	S	1.6
1993	12	NA	21.9	7.3	14.1	50	3.09	S	14.3
1992	1	NA	12.8 -	0.1	6.2	54	3.6	S	15.3
1992	2	NA	15.7	2.5	9.3	42	5.14	S	NA
1992	3	NA	19.9	6.3	13.5	41	4.12	E	6.9
1992	4	NA	28.2	13.4	21.2	34	4.63	S	5
1992	5	NA	33.2	18.5	26.4	26	4.63	W	8.8
1992	6	NA	37	22.3	30.6	16	4.12	N	0
1992	7	NA	37.6	21.3	30.9	16	3.09	N	0
1992	8	NA	38.2	23.7	32	17	3.6	N	0
1992	9	NA	36.6	21.2	29.9	17	3.09	N	0
1992	10	NA	31.9	14.1	23.6	18	2.06	S	0
1992	11	NA	22.1	10.9	16.1	56	2.57	E	38.7
1992	12	NA	16.3	5.2	10.2	60	3.09	S	NA
1991	1	NA	16.2	4.6	10.3	60	3.6	S	10.4
1991	2	NA	19	5.7	12.7	49	4.12	SSE	32.3
1991	3	NA	22.7	10.3	16.7	46	4.12	N	51.3
1991	4	NA	30.5	17.1	24.1	32	4.63	S	1.9
1991	5	NA	34	18.8	27	19	4.12	N	0
1991	6	NA	38.6	21.6	31.3	17	3.6	N	0
1991	7	NA	37.3	20.9	30.6	24	3.6	N	0
1991	8	NA	38.2	21.5	31.4	20	3.09	N	0
1991	9	NA	38.1	20.7	29.8	22	3.09	S	0
1991	10	NA	30.8	17.4	23.7	42	3.6	S	29.2
1991	11	NA	25.8	10.4	18.3	37	3.6	S	NA
1991	12	NA	18.4	4.9	11.7	46	4.12	S	0
